# Supplementary material for: Novel H3K4me3 marks are enriched at human- and chimpanzee-specific cytogenetic structures
Source: HighWire-hosted journal article supplement (doi:10.1101/gr.167742.113), 2014-06-10
Supplement: Supplemental_Tables.xlsx [file Supplemental_Tables.xlsx]

## Sheet: Table S1
Supplementary Table S1. Distribution of the 33 regions with human-specific enrichment of H3K4me3 modifications in neuronal cells. See Table 1 for details.
	with segmental duplications										without segmental duplications
	# Peaks	Density	Density enrichment	P-val	P-val perm	Peak size	Fraction	Fraction enrichment	P-val	P-val perm	# Peaks	Density	Density enrichment	P-val	P-val perm	Peak size	Fraction	Fraction enrichment	P-val	P-val perm
Genome wide	33	0.116374				76622	0.270207				29	0.113523				65624	0.25689
Subtelomeric regions	10	0.625414	5.37416	4.063e-09	0.001	29674	1.85585	6.86826	2.602e-17	0.001	10	0.695083	6.12285	4.771e-11	0.001	29674	2.06259	8.02907	7.277e-20	0.001
Pericentromeric regions	3	0.187131	1.60801	1	0.281	6245	0.389544	1.44165	1	0.259	2	0.176575	1.55541	1	0.452	2209	0.195027	0.759183	1	0.596
Human-specific seg dups	1	0.776324	6.67092	0.1388	0.134	1857	1.44163	5.33529	0.2412	0.069	—	—	—	—	—	—	—	—	—	—
Chimp-specific seg dups	0	0	0	1	1	0	0	0	1	1	—	—	—	—	—	—	—	—	—	—
16p11.2–12.2	0	0	0	not tested	1	0	0	0	not tested	1	0	0	0	not tested	1	0	0	0	not tested	1
Chr2:113-116 Mbp FP	2	6.66667	57.2864	not tested	0.002	5263	17.5433	64.9256	not tested	0.002	2	7.93392	69.8884	not tested	0.002	5263	20.8781	81.2725	not tested	0.002
2q21 AC	2	2.89855	24.9072	not tested	0.004	4262	6.17681	22.8596	not tested	0.012	0	0	0	not tested	1	0	0	0	not tested	1
Chr1 inversion BPs	0	0	0	not tested	1	0	0	0	not tested	1	0	0	0	not tested	1	0	0	0	not tested	1
Chr18 inversion BPs	1	4.73487	40.6866	not tested	0.034	6406	30.3316	112.253	not tested	0.001	1	5.08247	44.7705	not tested	0.019	6406	32.5583	126.74	not tested	0.002
Chimpanzee inversion BPs	0	0	0	1	1	0	0	0	1	1	0	0	0	1	1	0	0	0	1	1

## Sheet: Table S2
Supplementary Table S2. Distribution of the 61 regions with human-specific depletion of H3K4me3 modifications in prefrontal cortex. See Table 1 for details.
	with segmental duplications										without segmental duplications
	# Peaks	Density	Density enrichment	P-val	P-val perm	Peak size	Fraction	Fraction enrichment	P-val	P-val perm	# Peaks	Density	Density enrichment	P-val	P-val perm	Peak size	Fraction	Fraction enrichment	P-val	P-val perm
Genome wide	61	0.215116				67439	0.237823				59	0.23096				65551	0.256604
Subtelomeric regions	6	0.375248	1.7444	0.7763	0.131	7556	0.472562	1.98703	0.2823	0.06	6	0.41705	1.80572	0.3917	0.141	7385	0.513319	2.00043	0.2869	0.065
Pericentromeric regions	2	0.124754	0.579938	1	0.88	2404	0.149954	0.630529	1	0.744	2	0.176575	0.764525	1	0.77	2404	0.212243	0.82712	1	0.608
Human-specific seg dups	0	0	0	1	1	0	0	0	1	1	—	—	—	—	—	—	—	—	—	—
Chimp-specific seg dups	0	0	0	1	1	0	0	0	1	1	—	—	—	—	—	—	—	—	—	—
16p11.2–12.2	0	0	0	not tested	1	0	0	0	not tested	1	0	0	0	not tested	1	0	0	0	not tested	1
Chr2:113-116 Mbp FP	0	0	0	not tested	1	0	0	0	not tested	1	0	0	0	not tested	1	0	0	0	not tested	1
2q21 AC	0	0	0	not tested	1	0	0	0	not tested	1	0	0	0	not tested	1	0	0	0	not tested	1
Chr1 inversion BPs	0	0	0	not tested	1	0	0	0	not tested	1	0	0	0	not tested	1	0	0	0	not tested	1
Chr18 inversion BPs	0	0	0	not tested	1	0	0	0	not tested	1	0	0	0	not tested	1	0	0	0	not tested	1
Chimpanzee inversion BPs	1	0.421245	1.95822	1	0.391	1307	0.550567	2.31503	1	0.177	1	0.458035	1.98318	1	0.405	1307	0.598652	2.33298	1	0.207

## Sheet: Table S3
Supplementary Table S3. Distribution of the 164 regions with human-specific enrichment of H3K4me3 modifications in LCLs. See Table 1 for details.
	# Peaks	Density	Density enrichment	P-val	P-val perm	Peak size	Fraction	Fraction enrichment	P-val	P-val perm
Genome wide	164	0.641991				241787	0.946494
Subtelomeric regions	39	2.71082	4.22253	1.999e-23	0.001	55659	3.86876	4.08747	3.634e-19	0.001
Pericentromeric regions	11	0.971161	1.51273	0.4718	0.116	14270	1.25986	1.33108	0.8258	0.191
16p11.2–12.2	2	2.18041	3.39633	not tested	0.116	2941	3.2063	3.38755	not tested	0.069
Chr2:113-116 Mbp FP	1	3.96696	6.17916	not tested	0.149	1000	3.96696	4.19122	not tested	0.149
2q21 AC	0	0	0	not tested	1	0	0	0	not tested	1
Chr1 inversion BPs	0	0	0	not tested	1	0	0	0	not tested	1
Chr18 inversion BPs	0	0	0	not tested	1	0	0	0	not tested	1
Chimpanzee inversion BPs	2	0.916071	1.42692	1	0.409	2317	1.06127	1.12126	1	0.394

## Sheet: Table S4
Supplementary Table S4. Distribution of the 109 regions with human-specific depletion of H3K4me3 modifications in LCL. See Table 1 for details.
	# Peaks	Density	Density enrichment	P-val	P-val perm	Peak size	Fraction	Fraction enrichment	P-val	P-val perm
Genome wide	109	0.426689				162116	0.634616
Subtelomeric regions	12	0.834099	1.95482	0.04464	0.021	17573	1.22147	1.92474	0.01761	0.026
Pericentromeric regions	5	0.441437	1.03456	1	0.553	7214	0.636905	1.00361	1	0.477
16p11.2–12.2	0	0	0	not tested	1	0	0	0	not tested	1
Chr2:113-116 Mbp FP	0	0	0	not tested	1	0	0	0	not tested	1
2q21 AC	0	0	0	not tested	1	0	0	0	not tested	1
Chr1 inversion BPs	0	0	0	not tested	1	0	0	0	not tested	1
Chr18 inversion BPs	1	5.08247	11.9114	not tested	0.071	1450	7.36959	11.6127	not tested	0.039
Chimpanzee inversion BPs	2	0.916071	2.14693	0.7987	0.251	3078	1.40983	2.22155	0.4864	0.134

## Sheet: Table S5
Supplementary Table S5. Distribution of the 523 regions with chimpanzee-specific enrichment of H3K4me3 modifications in prefrontal cortex. See Table 1 for details.
	with segmental duplications										without segmental duplications
	# Peaks	Density	Density enrichment	P-val	P-val perm	Peak size	Fraction	Fraction enrichment	P-val	P-val perm	# Peaks	Density	Density enrichment	P-val	P-val perm	Peak size	Fraction	Fraction enrichment	P-val	P-val perm
Genome wide	523	1.84436				527714	1.86098				457	1.78896				457937	1.79263
Subtelomeric regions	136	8.10913	4.39673	8.743e-84	0.001	137433	8.19457	4.40337	8.704e-49	0.001	122	8.16892	4.56629	5.368e-80	0.001	125899	8.42999	4.70258	1.294e-48	0.001
Pericentromeric regions	41	2.45119	1.32902	0.2979	0.042	41510	2.48168	1.33354	0.2586	0.039	30	2.554	1.42765	0.1342	0.118	31824	2.70929	1.51135	0.05653	0.069
Human-specific seg dups	1	0.776324	0.420919	1	0.908	182	0.141291	0.0759229	0.9277	0.903	—	—	—	—	—	—	—	—	—	—
Chimp-specific seg dups	9	20.2869	10.9994	7.01e-19	0.001	8885	20.0276	10.7619	1.104e-06	0.001	—	—	—	—	—	—	—	—	—	—
16p11.2–12.2	5	3.77358	2.04602	not tested	0.105	4714	3.55774	1.91175	not tested	0.111	3	3.27062	1.82822	not tested	0.282	2937	3.20194	1.78617	not tested	0.201
Chr2:113-116 Mbp FP	3	10	5.42195	not tested	0.016	2754	9.18	4.93289	not tested	0.025	3	11.9009	6.6524	not tested	0.015	2754	10.925	6.0944	not tested	0.02
2q21 AC	1	1.44928	0.78579	not tested	0.732	827	1.19855	0.644043	not tested	0.574	1	1.96999	1.10119	not tested	0.637	827	1.62918	0.908821	not tested	0.484
Chr1 inversion BPs	0	0	0	not tested	1	0	0	0	not tested	1	0	0	0	not tested	1	0	0	0	not tested	1
Chr18 inversion BPs	2	9.46975	5.13445	not tested	0.059	3110	14.7255	7.91275	not tested	0.009	2	10.1649	5.68204	not tested	0.063	3110	15.8065	8.81749	not tested	0.007
Chimpanzee inversion BPs	6	2.52747	1.37038	1	0.276	6171	2.5995	1.39685	1	0.211	6	2.74821	1.53621	0.8616	0.288	6171	2.82654	1.57675	0.8939	0.217

## Sheet: Table S6
Supplementary Table S6. Distribution of the 224 regions with chimpanzee-specific enrichment of H3K4me3 modifications in LCLs. See Table 1 for details.
	# Peaks	Density	Density enrichment	P-val	P-val perm	Peak size	Fraction	Fraction enrichment	P-val	P-val perm
Genome wide	224	0.876865				333615	1.30596
Subtelomeric regions	29	1.94179	2.21447	1.775e-05	0.001	39489	2.64412	2.02465	0.0001557	0.003
Pericentromeric regions	5	0.425667	0.485442	0.2727	0.976	7072	0.602064	0.461012	0.07646	0.961
16p11.2–12.2	0	0	0	not tested	1	0	0	0	not tested	1
Chr2:113-116 Mbp FP	0	0	0	not tested	1	0	0	0	not tested	1
2q21 AC	0	0	0	not tested	1	0	0	0	not tested	1
Chr1 inversion BPs	0	0	0	not tested	1	0	0	0	not tested	1
Chr18 inversion BPs	0	0	0	not tested	1	0	0	0	not tested	1
Chimpanzee inversion BPs	3	1.37411	1.56707	1	0.283	4583	2.09918	1.60738	0.651	0.186

## Sheet: Table S7
Supplementary Table S7. Distribution of the 327 regions with chimpanzee-specific depletion of H3K4me3 modifications in prefrontal cortex. See Table 1 for details.
	with segmental duplications										without segmental duplications
	# Peaks	Density	Density enrichment	P-val	P-val perm	Peak size	Fraction	Fraction enrichment	P-val	P-val perm	# Peaks	Density	Density enrichment	P-val	P-val perm	Peak size	Fraction	Fraction enrichment	P-val	P-val perm
Genome wide	327	1.15316				481685	1.69866				268	1.04911				385628	1.50957
Subtelomeric regions	46	2.74279	2.3785	2.054e-09	0.001	62003	3.69699	2.17642	8.897e-08	0.001	40	2.67833	2.55297	7.117e-10	0.001	53960	3.61307	2.39344	1.654e-08	0.002
Pericentromeric regions	49	2.92947	2.54038	1.541e-11	0.001	74145	4.43277	2.60957	3.947e-13	0.001	23	1.95807	1.86642	0.005539	0.03	31588	2.68919	1.78143	0.004261	0.079
Human-specific seg dups	27	20.9607	18.1767	4.758e-97	0.001	48713	37.8171	22.2629	4.178e-48	0.001	—	—	—	—	—	—	—	—	—	—
Chimp-specific seg dups	0	0	0	1	1	0	0	0	1	1	—	—	—	—	—	—	—	—	—	—
16p11.2–12.2	3	2.26415	1.96343	not tested	0.185	3658	2.76075	1.62526	not tested	0.206	1	1.09021	1.03918	not tested	0.702	955	1.04115	0.689698	not tested	0.588
Chr2:113-116 Mbp FP	0	0	0	not tested	1	0	0	0	not tested	1	0	0	0	not tested	1	0	0	0	not tested	1
2q21 AC	2	2.89855	2.51357	not tested	0.188	1369	1.98406	1.16801	not tested	0.339	0	0	0	not tested	1	0	0	0	not tested	1
Chr1 inversion BPs	4	10.8672	9.42381	not tested	0.002	9742	26.4671	15.5811	not tested	0.001	1	6.30334	6.00829	not tested	0.161	875	5.51542	3.65364	not tested	0.118
Chr18 inversion BPs	1	4.73487	4.10599	not tested	0.222	1194	5.65344	3.32818	not tested	0.12	1	5.08247	4.84457	not tested	0.204	1194	6.06847	4.02	not tested	0.108
Chimpanzee inversion BPs	6	2.52747	2.19177	0.2384	0.058	5233	2.20438	1.29772	1	0.29	6	2.74821	2.61957	0.04149	0.066	5233	2.3969	1.5878	0.8154	0.297

## Sheet: Table S8
Supplementary Table S8. Distribution of the 36 regions with chimpanzee-specific depletion of H3K4me3 modifications in LCL. See Table 1 for details.
	# Peaks	Density	Density enrichment	P-val	P-val perm	Peak size	Fraction	Fraction enrichment	P-val	P-val perm
Genome wide	36	0.140925				48762	0.190883
Subtelomeric regions	0	0	0	0.4047	1	0	0	0	0.3517	1
Pericentromeric regions	3	0.2554	1.81232	0.8538	0.231	3835	0.326487	1.71041	0.8615	0.173
16p11.2–12.2	0	0	0	not tested	1	0	0	0	not tested	1
Chr2:113-116 Mbp FP	0	0	0	not tested	1	0	0	0	not tested	1
2q21 AC	0	0	0	not tested	1	0	0	0	not tested	1
Chr1 inversion BPs	0	0	0	not tested	1	0	0	0	not tested	1
Chr18 inversion BPs	0	0	0	not tested	1	0	0	0	not tested	1
Chimpanzee inversion BPs	0	0	0	1	1	0	0	0	1	1

## Sheet: Table S9
Supplementary Table S9. P-values of permutation tests by replacing the genomic regions 1000 times.
	Density					Fraction
	Human enriched	Human depleted	33 Neuronal	Chimpanzee enriched	Chimpanzee depleted	Human enriched	Human depleted	33 Neuronal	Chimpanzee enriched	Chimpanzee depleted
Subtelomeric regions	0.001	0.175	0.001	0.001	0.001	0.001	0.094	0.001	0.001	0.001
Pericentromeric regions	0.001	0.938	0.301	0.16	0.001	0.001	0.863	0.267	0.165	0.001
Chr2:113-116 Mbp FP	0.003	1	0.004	0.034	1	0.001	1	0.004	0.033	1
2q21 AC	0.014	1	0.01	0.477	0.145	0.013	1	0.021	0.35	0.245
Chr1 inversion BPs	0.001	1	1	1	0.007	0.001	1	1	1	0.001
Chr18 inversion BPs	0.025	1	0.035	0.117	0.24	0.003	1	0.003	0.04	0.145
Chimpanzee inversion BPs	0.166	0.391	1	0.23	0.065	0.24	0.176	1	0.17	0.232

## Sheet: Table S10
Supplementary Table S10. Number of H3K4me3 peaks enriched or depleted in human and chimpanzee LCL, number of H3K4me3-marked exons significantly more/less expressed in human and chimpanzee LCL (see Methods), their overlap, and the fraction of specific peaks that overlap with such an exon
	H3K4me3	Exons	overlap	Percentage	Note
human enriched/more expressed	164	193	43	0.262195	4 at subtelomeric regions, 4 at pericentromeric regions
chimp enriched/more expressed	224	162	47	0.209821	5 at subtelomeric regions, 1 at pericentromeric regions, 1 close to inv BPs
human depleted/less expressed	109	46	14	0.12844	4 at subtelomeric regions
chimp depleted/less expressed	36	45	5	0.138889
